# Supplementary material for: Unraveling Desmoid-Type Fibromatosis-Specific Health-Related Quality of Life: Who Is at Risk for Poor Outcomes
Source: MDPI journal article supplement (doi:10.3390/cancers14122979), 2022-06-16
Supplement: s1 [file s1]

**Table S2.** Mean DTF-QoL single item scores ( $\pm$ SD) in relation to socio-demographic and clinical characteristics

|                                        |                              | DTF-QoL single items <sup>+</sup> |                                    |                                  |                          |                                    |                                |
|----------------------------------------|------------------------------|-----------------------------------|------------------------------------|----------------------------------|--------------------------|------------------------------------|--------------------------------|
|                                        |                              | Decreased libido                  | Hair loss                          | DTF changed life in negative way | Hair colour change       | Wasting time of cancer specialists | Rash treatment                 |
| Age (years)                            |                              |                                   |                                    |                                  |                          |                                    |                                |
|                                        | 18-39                        | 23.1 (31.4)                       | 11.7 (25.6)                        | 39.3 (34.4)                      | 6.3 (19.8)               | 14.2 (26.0)                        | 14.0 (28.4)                    |
|                                        | ≥40                          | 28.1 (36.3)                       | 10.2 (23.3)                        | 27.7 (31.2)                      | 7.4 (18.8)               | 9.0 (19.3)                         | 10.1 (25.0)                    |
|                                        | <i>P</i> -value              | 0.442                             | 0.703                              | <b>0.007</b>                     | 0.364                    | 0.136                              | 0.174                          |
| Sex                                    |                              |                                   |                                    |                                  |                          |                                    |                                |
|                                        | Male                         | 16.4 (29.6)                       | 5.4 (18.3)                         | 30.6 (31.5)                      | 8.8 (24.8)               | 4.3 (11.3)                         | 12.9 (26.6)                    |
|                                        | Female                       | 28.9 (34.7)                       | 12.9 (26.1)                        | 34.5 (33.9)                      | 6.1 (16.8)               | 14.3 (25.5)                        | 11.7 (26.9)                    |
|                                        | <i>P</i> -value              | <b>0.011</b>                      | <b>0.016</b>                       | 0.499                            | 0.857                    | <b>0.006</b>                       | 0.527                          |
| Relationship status                    |                              |                                   |                                    |                                  |                          |                                    |                                |
|                                        | Partnered                    | 25.9 (33.9)                       | 11.4 (25.1)                        | 32.2 (32.0)                      | 7.0 (19.4)               | 11.0 (21.7)                        | 10.6 (25.6)                    |
|                                        | Not partnered                | 23.8 (33.9)                       | 8.8 (21.8)                         | 37.7 (37.6)                      | 6.4 (19.2)               | 13.8 (27.3)                        | 16.4 (30.4)                    |
|                                        | <i>P</i> -value              | 0.714                             | 0.512                              | 0.469                            | 0.815                    | 0.730                              | 0.122                          |
| Education level                        |                              |                                   |                                    |                                  |                          |                                    |                                |
|                                        | Low                          | 24.0 (35.4)                       | 4.6 (14.1)                         | 25.9 (28.9)                      | 6.7 (22.1)               | 12.0 (22.8)                        | 6.5 (15.6)                     |
|                                        | Medium                       | 26.8 (32.8)                       | 12.4 (26.6)                        | 36.5 (35.4)                      | 7.1 (19.7)               | 8.5 (18.8)                         | 12.1 (27.3)                    |
|                                        | High                         | 23.8 (35.0)                       | 11.4 (24.4)                        | 32.0 (31.1)                      | 6.3 (17.4)               | 16.9 (28.4)                        | 14.6 (29.9)                    |
|                                        | <i>P</i> -value <sup>#</sup> | 0.826                             | 0.236                              | 0.218                            | 0.958                    | <b>0.044<sup>a</sup></b>           | 0.330                          |
| Employment status                      |                              |                                   |                                    |                                  |                          |                                    |                                |
|                                        | Working                      | 23.1 (31.4)                       | 8.6 (21.1)                         | 31.8 (31.2)                      | 4.8 (16.1)               | 12.7 (24.1)                        | 11.7 (26.8)                    |
|                                        | Not working                  | 30.7 (38.5)                       | 15.4 (29.5)                        | 36.7 (37.0)                      | 11.5 (24.6)              | 9.6 (20.7)                         | 12.7 (26.8)                    |
|                                        | <i>P</i> -value              | 0.299                             | 0.133                              | 0.516                            | <b>0.021</b>             | 0.328                              | 0.662                          |
| Comorbidity                            |                              |                                   |                                    |                                  |                          |                                    |                                |
|                                        | None                         | 16.5 (30.1)                       | 7.4 (22.2)                         | 31.1 (31.9)                      | 5.1 (17.5)               | 12.6 (23.7)                        | 12.2 (26.7)                    |
|                                        | 1                            | 25.8 (35.0)                       | 12.6 (25.1)                        | 32.0 (33.8)                      | 4.6 (16.5)               | 8.6 (19.2)                         | 6.9 (21.6)                     |
|                                        | ≥2                           | 37.9 (33.9)                       | 13.6 (26.2)                        | 38.0 (34.4)                      | 11.5 (23.5)              | 13.6 (25.6)                        | 16.9 (30.8)                    |
|                                        | <i>P</i> -value <sup>#</sup> | <b>0.001<sup>b</sup></b>          | 0.215                              | 0.382                            | 0.078                    | 0.368                              | 0.084                          |
| Time since diagnosis                   |                              |                                   |                                    |                                  |                          |                                    |                                |
|                                        | <5 years                     | 25.9 (34.4)                       | 10.3 (25.6)                        | 32.8 (32.8)                      | 4.4 (14.4)               | 11.1 (21.8)                        | 8.9 (24.6)                     |
|                                        | ≥5 years                     | 24.9 (33.2)                       | 11.6 (23.0)                        | 34.3 (33.9)                      | 9.5 (23.4)               | 12.3 (24.5)                        | 15.7 (28.8)                    |
|                                        | <i>P</i> -value              | 0.928                             | 0.229                              | 0.787                            | 0.068                    | 0.875                              | <b>0.008</b>                   |
| Treatments received <sup>1</sup>       |                              |                                   |                                    |                                  |                          |                                    |                                |
|                                        | Only surveillance            | 21.6 (30.0)                       | 6.9 (19.8)                         | 21.8 (26.3)                      | 2.6 (10.5)               | 9.6 (19.6)                         | 0.8 (5.1)                      |
|                                        | Only surgery                 | 18.6 (29.9)                       | 5.2 (14.8)                         | 25.5 (30.1)                      | 5.6 (16.8)               | 12.0 (24.0)                        | 6.9 (19.1)                     |
|                                        | Other                        | 35.2 (38.6)                       | 19.4 (31.6)                        | 51.6 (34.5)                      | 11.7 (25.5)              | 13.5 (25.4)                        | 27.4 (36.3)                    |
|                                        | <i>P</i> -value <sup>#</sup> | <b>0.009<sup>c,d</sup></b>        | <b>&lt;0.001<sup>c,d</sup></b>     | <b>&lt;0.001<sup>c,d</sup></b>   | <b>0.011<sup>c</sup></b> | 0.535                              | <b>&lt;0.001<sup>c,d</sup></b> |
| Recurrent disease                      |                              |                                   |                                    |                                  |                          |                                    |                                |
|                                        | Yes                          | 23.1 (30.7)                       | 8.1 (19.4)                         | 46.3 (32.3)                      | 7.9 (25.0)               | 13.0 (26.7)                        | 23.6 (36.7)                    |
|                                        | No                           | 26.0 (34.5)                       | 11.5 (25.4)                        | 30.8 (32.9)                      | 6.6 (17.8)               | 11.3 (22.2)                        | 9.5 (23.5)                     |
|                                        | <i>P</i> -value              | 0.734                             | 0.529                              | <b>0.003</b>                     | 0.618                    | 0.991                              | <b>0.005</b>                   |
| Recurrent disease after surgery (n=98) |                              |                                   |                                    |                                  |                          |                                    |                                |
|                                        | Yes                          | 23.1 (30.7)                       | 8.1 (19.4)                         | 46.3 (32.4)                      | 7.9 (25.0)               | 13.0 (26.7)                        | 23.6 (36.7)                    |
|                                        | No                           | 20.9 (32.6)                       | 8.8 (23.2)                         | 26.3 (33.2)                      | 6.1 (17.6)               | 10.5 (22.9)                        | 8.3 (23.1)                     |
|                                        | <i>P</i> -value              | 0.625                             | 0.897                              | <b>0.002</b>                     | 0.689                    | 0.685                              | <b>0.010</b>                   |
| Tumour location                        |                              |                                   |                                    |                                  |                          |                                    |                                |
|                                        | Abdominal wall               | 24.7 (35.0)                       | 8.6 (20.3)                         | 27.0 (34.5)                      | 3.3 (10.1)               | 12.6 (22.4)                        | 4.2 (14.3)                     |
|                                        | Intra-abdominal              | 17.2 (32.9)                       | 14.5 (32.3)                        | 29.9 (32.3)                      | 10.8 (22.8)              | 5.1 (14.4)                         | 11.1 (24.6)                    |
|                                        | Upper extremity              | 33.3 (39.5)                       | 4.6 (14.7)                         | 34.5 (28.8)                      | 14.3 (30.7)              | 12.6 (16.5)                        | 20.7 (36.1)                    |
|                                        | Lower extremity              | 20.0 (27.4)                       | 10.6 (21.5)                        | 48.5 (35.2)                      | 13.3 (27.4)              | 10.6 (21.5)                        | 25.8 (35.5)                    |
|                                        | Head/neck                    | 26.7 (37.8)                       | 38.5 (42.7)                        | 38.5 (42.7)                      | 5.6 (13.0)               | 5.1 (12.5)                         | 7.7 (20.0)                     |
|                                        | Trunk                        | 27.1 (32.0)                       | 7.4 (16.7)                         | 30.2 (29.2)                      | 1.4 (9.5)                | 15.4 (30.2)                        | 11.1 (27.5)                    |
|                                        | Hip/pelvis/gluteal region    | 29.6 (32.1)                       | 11.7 (24.8)                        | 46.7 (34.9)                      | 5.6 (17.1)               | 15.0 (29.6)                        | 13.3 (27.4)                    |
|                                        | <i>P</i> -value <sup>#</sup> | 0.656                             | <b>0.001<sup>e,f,g,h,i,j</sup></b> | 0.083                            | <b>0.032<sup>*</sup></b> | 0.396                              | <b>0.026<sup>k</sup></b>       |

<sup>+</sup> Higher scores indicate a higher level of symptomatology / problems.

<sup>1</sup> Active surveillance only and surgery only: including patients who received analgesics; Other treatment including patients who received only systemic therapy (i.e. chemotherapy, hormonal therapy, targeted medical therapy) or targeted therapy (i.e. radiotherapy, isolated limb perfusion, high-intensity focused ultrasound, cryoablation) or a combination of any form of active treatments.

Bold values indicate significant variables ( $P < 0.05$ )

#  $P$ -value of ANOVA for differences between the subgroups

\* No statistically significant differences in Bonferroni post hoc analysis

a, b, c, d, e, f, g, h, i, j, k Shows which groups are significantly different according to the Bonferroni post hoc analysis ( $P < 0.05$ ):

- Medium education level versus: <sup>a</sup> high
- $\geq 2$  comorbidities versus: <sup>b</sup> none
- Other treatment versus: <sup>c</sup> surveillance only, <sup>d</sup> surgery only
- Head and neck versus: <sup>e</sup> abdominal wall, <sup>f</sup> intra-abdominal, <sup>g</sup> upper extremity, <sup>h</sup> lower extremity, <sup>i</sup> trunk, <sup>j</sup> hip/pelvis/gluteal region
- Abdominal wall versus: <sup>k</sup> lower extremity
