# Supplementary material for: Unraveling Desmoid-Type Fibromatosis-Specific Health-Related Quality of Life: Who Is at Risk for Poor Outcomes
Source: MDPI journal article supplement (doi:10.3390/cancers14122979), 2022-06-16
Supplement: s1 [file s1]

**Table S1** Specification of active treatment types (n=148)

|                  |                                       | n (%) <sup>*</sup> |
|------------------|---------------------------------------|--------------------|
| Surgery          |                                       | 98 (66.2)          |
| Systemic therapy | Total                                 | 60 (40.5)          |
|                  | Chemotherapy <sup>a</sup>             | 37 (25.0)          |
|                  | Hormonal therapy <sup>b</sup>         | 28 (18.9)          |
|                  | Targeted medical therapy <sup>c</sup> | 15 (10.1)          |
| Local therapy    | Total                                 | 43 (29.1)          |
|                  | Radiotherapy                          | 34 (23.0)          |
|                  | Isolated limb perfusion               | 5 (3.4)            |
|                  | High-intensity focused ultrasound     | 2 (1.4)            |
|                  | Cryoablation                          | 6 (4.1)            |

\* Percentage of the total number of patients with desmoid-type fibromatosis who received an active treatment. Patients could have received multiple types of active treatments

<sup>a</sup> n=23 vinorelbine, n=4 vinblastine/methotrexate, n=14 doxorubicin, n=1 VAC (vincristine, actomycin-D, cyclophosphamide)

<sup>b</sup> Hormonal therapy includes: tamoxifen

<sup>c</sup> Targeted medical therapy include: tyrosine kinase and gamma-secretase inhibitors
